# Supplementary material for: Non-conventional hydrogen bonds: pterins-metal anions
Source: Royal Society of Chemistry journal article supplement (doi:10.1039/c1cp20134d), 2011-01-01
Supplement: c1cp20134d.pdf [file c1cp20134d.pdf]

## Supplementary Information

### Non-conventional Hydrogen Bonds: Pterins-Metal Anions Rubicelia Vargas and Ana Martínez

Table 1S. Bond distances (in Å) and angles (in degrees) of  $(\text{NH}_3\text{-Au})^{-1}$  optimized at B3LYP/6-311++G(3df,3pd)+LANL2DZ level. Final energy evaluation was done with this optimized geometry at 6-311++G(3df,3pd)+PP level. Available experimental results reported before are included for comparison.

| 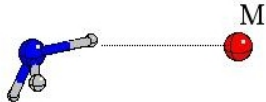 |               |           |                     |      |
|-----------------------------------------------------------------------------------|---------------|-----------|---------------------|------|
| Basis set                                                                         | Bond Distance |           | Bond Angle<br>N-H-M | HBE  |
|                                                                                   | H-M           | N-M       |                     |      |
| B3LYP/<br>6-311++G(3df,3pd)+LANL2DZ<br>6-311++G(3df,3pd)+PP                       | 2.61          | 3.61      | 162.8               | -5.7 |
| Experimental <sup>1</sup>                                                         | 2.58          | 3.63-3.73 | 158                 | -6.0 |

<sup>1</sup> Reference 37 on the paper

Table 2S. Optimized parameters and dissociation energies (De) in the equilibrium geometry of CuOH, AgOH and AuOH, calculated with B3LYP/6-311++G(3df,3pd) for Cu-OH and B3LYP/6-311++G(3df,3pd)+LANL2DZ (for Ag-OH and Au-OH). Final energy evaluation for Ag and Au systems were done at B3LYP/6-311++G(3df,3pd)+PP level. Available experimental results and other theoretical values reported by Ikeda *et al* (Reference 38) are included for comparison.

| Method                                                                      | CuOH        |              |              |                   |
|-----------------------------------------------------------------------------|-------------|--------------|--------------|-------------------|
|                                                                             | De (eV)     | R(Cu-O)      | R(O-H)       | $\theta$ (Cu-O-H) |
| NR-SCF                                                                      | 1.59        | 1.846        | 0.943        | 119.4             |
| NR-CCSD(T)                                                                  | 3.05        | 1.799        | 0.973        | 109.2             |
| DKR3-SCF                                                                    | 1.59        | 1.826        | 0.943        | 117.8             |
| DKR3-CCSD(T)                                                                | 3.08        | 1.774        | 0.974        | 108.1             |
| Experimental                                                                | 2.69        | 1.774        | 0.964        | 110.1             |
| <b>B3LYP/6-311++G(3df,3pd)</b>                                              | <b>2.97</b> | <b>1.793</b> | <b>0.963</b> | <b>110.3</b>      |
|                                                                             | AgOH        |              |              |                   |
|                                                                             | De (eV)     | R(Ag-O)      | R(O-H)       | $\theta$ (Ag-O-H) |
| NR-SCF                                                                      | 1.14        | 2.101        | 0.943        | 120.8             |
| NR-CCSD(T)                                                                  | 2.41        | 2.084        | 0.973        | 109.0             |
| DKR3-SCF                                                                    | 1.00        | 2.058        | 0.944        | 116.4             |
| DKR3-CCSD(T)                                                                | 2.31        | 2.035        | 0.975        | 106.5             |
| Experimental                                                                | -           | 2.018        | 0.963        | 107.8             |
| <b>B3LYP/6-311++G(3df,3pd)+LANL2DZ</b><br><b>B3LYP/6-311++G(3df,3pd)+PP</b> | <b>2.27</b> | <b>2.057</b> | <b>0.985</b> | <b>111.0</b>      |
|                                                                             | AuOH        |              |              |                   |
|                                                                             | De (eV)     | R(Au-O)      | R(O-H)       | $\theta$ (Au-O-H) |
| NR-SCF                                                                      | 1.02        | 2.161        | 0.943        | 119.2             |
| NR-CCSD(T)                                                                  | 2.30        | 2.145        | 0.974        | 108.0             |
| DKR3-SCF                                                                    | 0.78        | 1.981        | 0.945        | 109.7             |
| DKR3-CCSD(T)                                                                | 2.39        | 1.963        | 0.977        | 103.7             |
| <b>B3LYP/6-311++G(3df,3pd)+LANL2DZ</b><br><b>B3LYP/6-311++G(3df,3pd)+PP</b> | <b>2.19</b> | <b>2.003</b> | <b>0.987</b> | <b>107.9</b>      |
